# Supplementary material for: Relative Effectiveness of Cell-Cultured versus Egg-Based Seasonal Influenza Vaccines in Preventing Influenza-Related Outcomes in Subjects 18 Years Old or Older: A Systematic Review and Meta-Analysis
Source: MDPI journal article supplement (doi:10.3390/ijerph19020818), 2022-01-12
Supplement: s1 [file s1]

Table S2 Leave one out analysis, 2017-2018 and 2018-2019.  
Random-effects model Method: REML

| Season and Omitted study   | aRR   | [95% conf | interval] | p-value |
|----------------------------|-------|-----------|-----------|---------|
| 2017-2018 Influenza season |       |           |           |         |
| Boikos 2020a               | 0.891 | 0.865     | 0.918     | 0.000   |
| Bruxvoort 2019a            | 0.892 | 0.866     | 0.919     | 0.000   |
| Divino 2020                | 0.921 | 0.858     | 0.988     | 0.022   |
| Eick-Cost 2018             | 0.890 | 0.863     | 0.917     | 0.000   |
| Izurieta 2019b             | 0.924 | 0.845     | 1.010     | 0.080   |
| Klein 2020a                | 0.890 | 0.864     | 0.917     | 0.000   |
| Martin 2020c               | 0.892 | 0.866     | 0.919     | 0.000   |
| exp(theta)                 | 0.892 | 0.866     | 0.919     | 0.000   |
| 2018-2019 influenza season |       |           |           |         |
| Boikos 2021c               | 0.947 | 0.920     | 0.975     | 0.000   |
| Boikos 2021d               | 0.993 | 0.952     | 1.035     | 0.725   |
| Fu Tseng 2019b             | 0.971 | 0.929     | 1.015     | 0.192   |
| Izurieta 2020a             | 0.972 | 0.917     | 1.029     | 0.325   |
| Krishnarajah 2021          | 0.977 | 0.927     | 1.029     | 0.377   |
| exp(theta)                 | 0.972 | 0.931     | 1.015     | 0.200   |

aRR, adjusted relative risk

exp(theta) pooled adjusted relative risk
