# Supplementary material for: Relative Effectiveness of Cell-Cultured versus Egg-Based Seasonal Influenza Vaccines in Preventing Influenza-Related Outcomes in Subjects 18 Years Old or Older: A Systematic Review and Meta-Analysis
Source: MDPI journal article supplement (doi:10.3390/ijerph19020818), 2022-01-12

Figure S3. Graphical and statistical small study bias analysis by season, age group, reported outcome, outcome determination method, study design, funding and risk of bias (I)

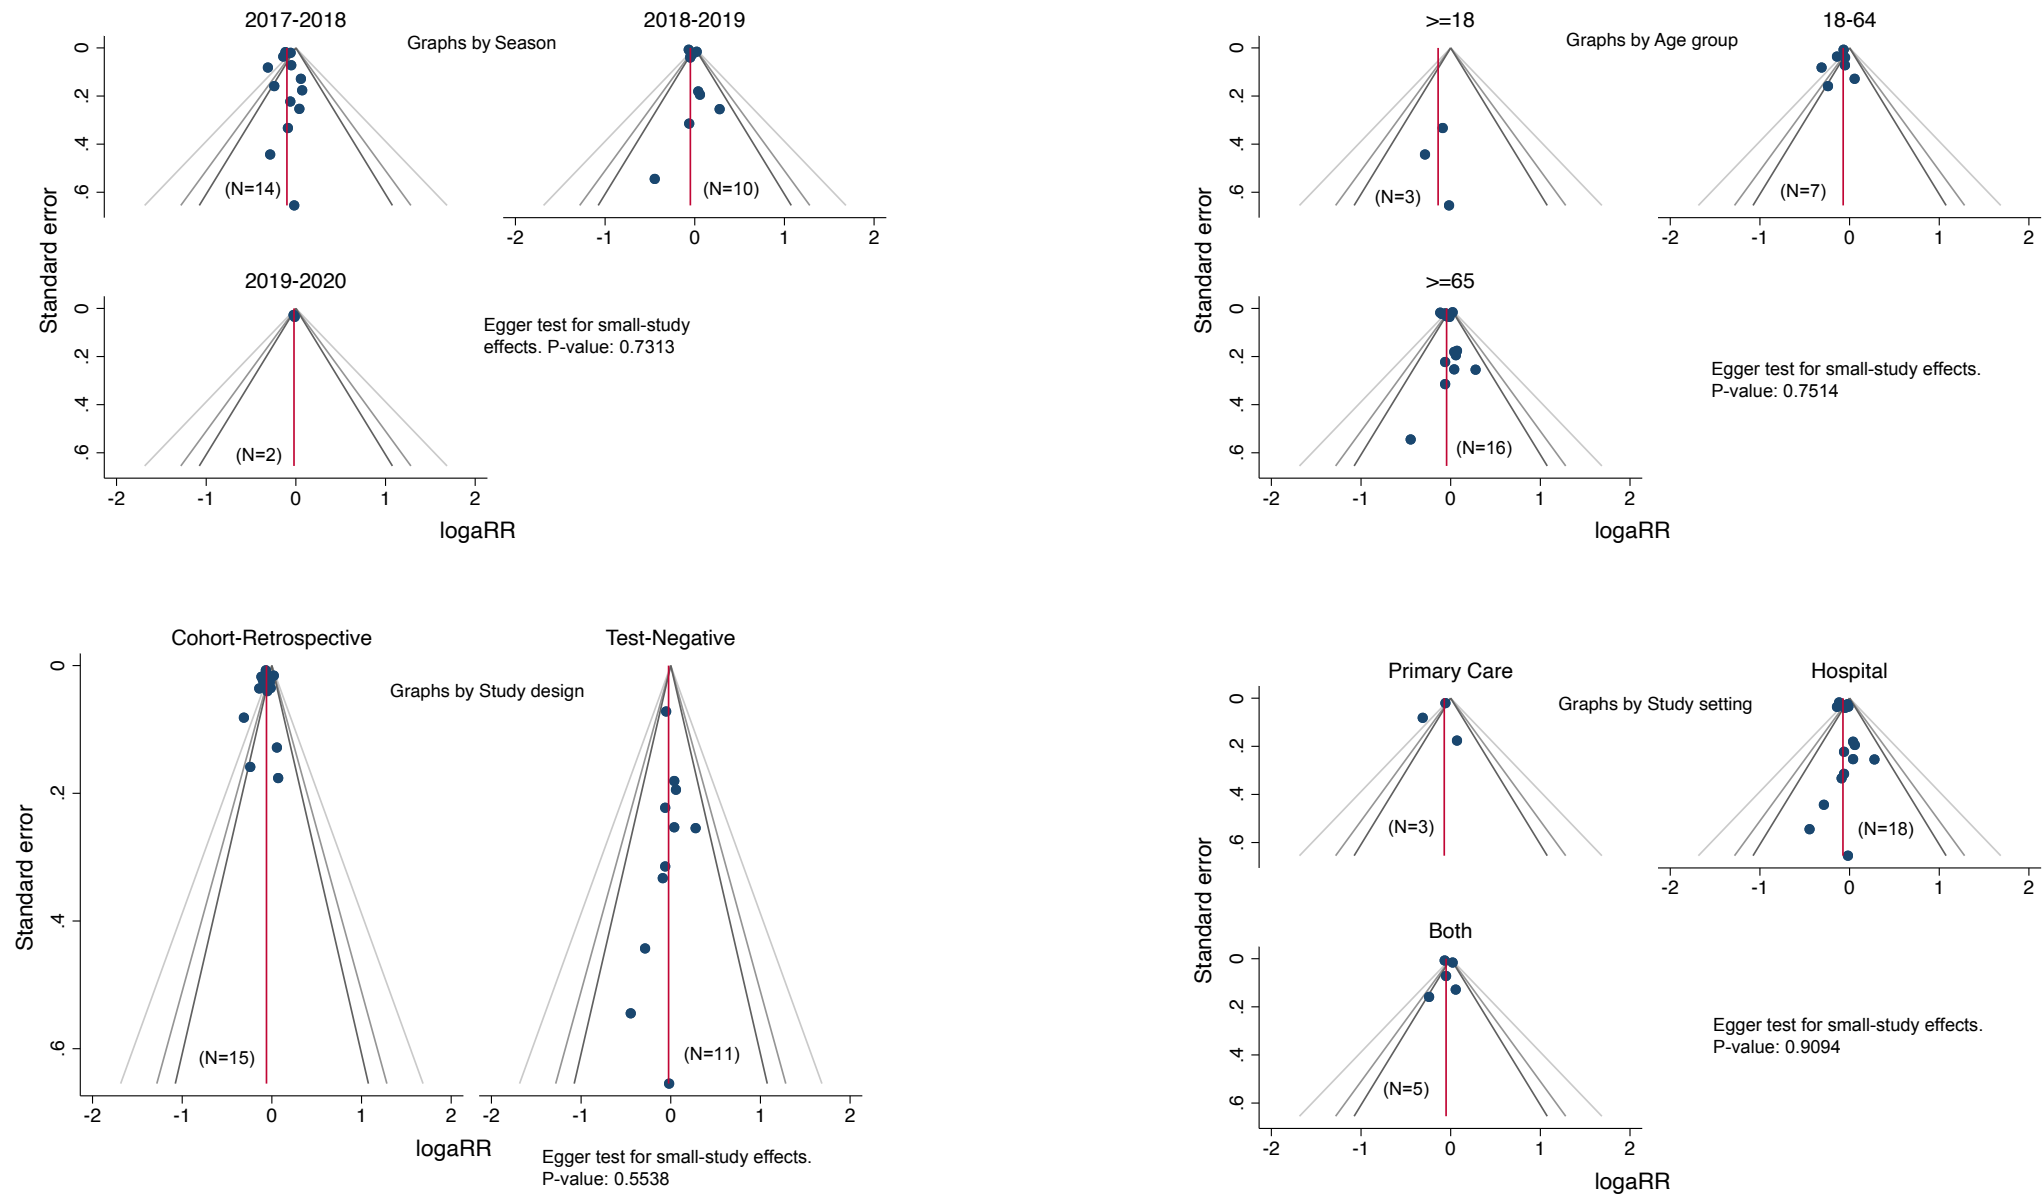

Figure S3. Graphical and statistical small study bias analysis by season, age group, reported outcome, outcome determination method, study design, funding and risk of bias (II)

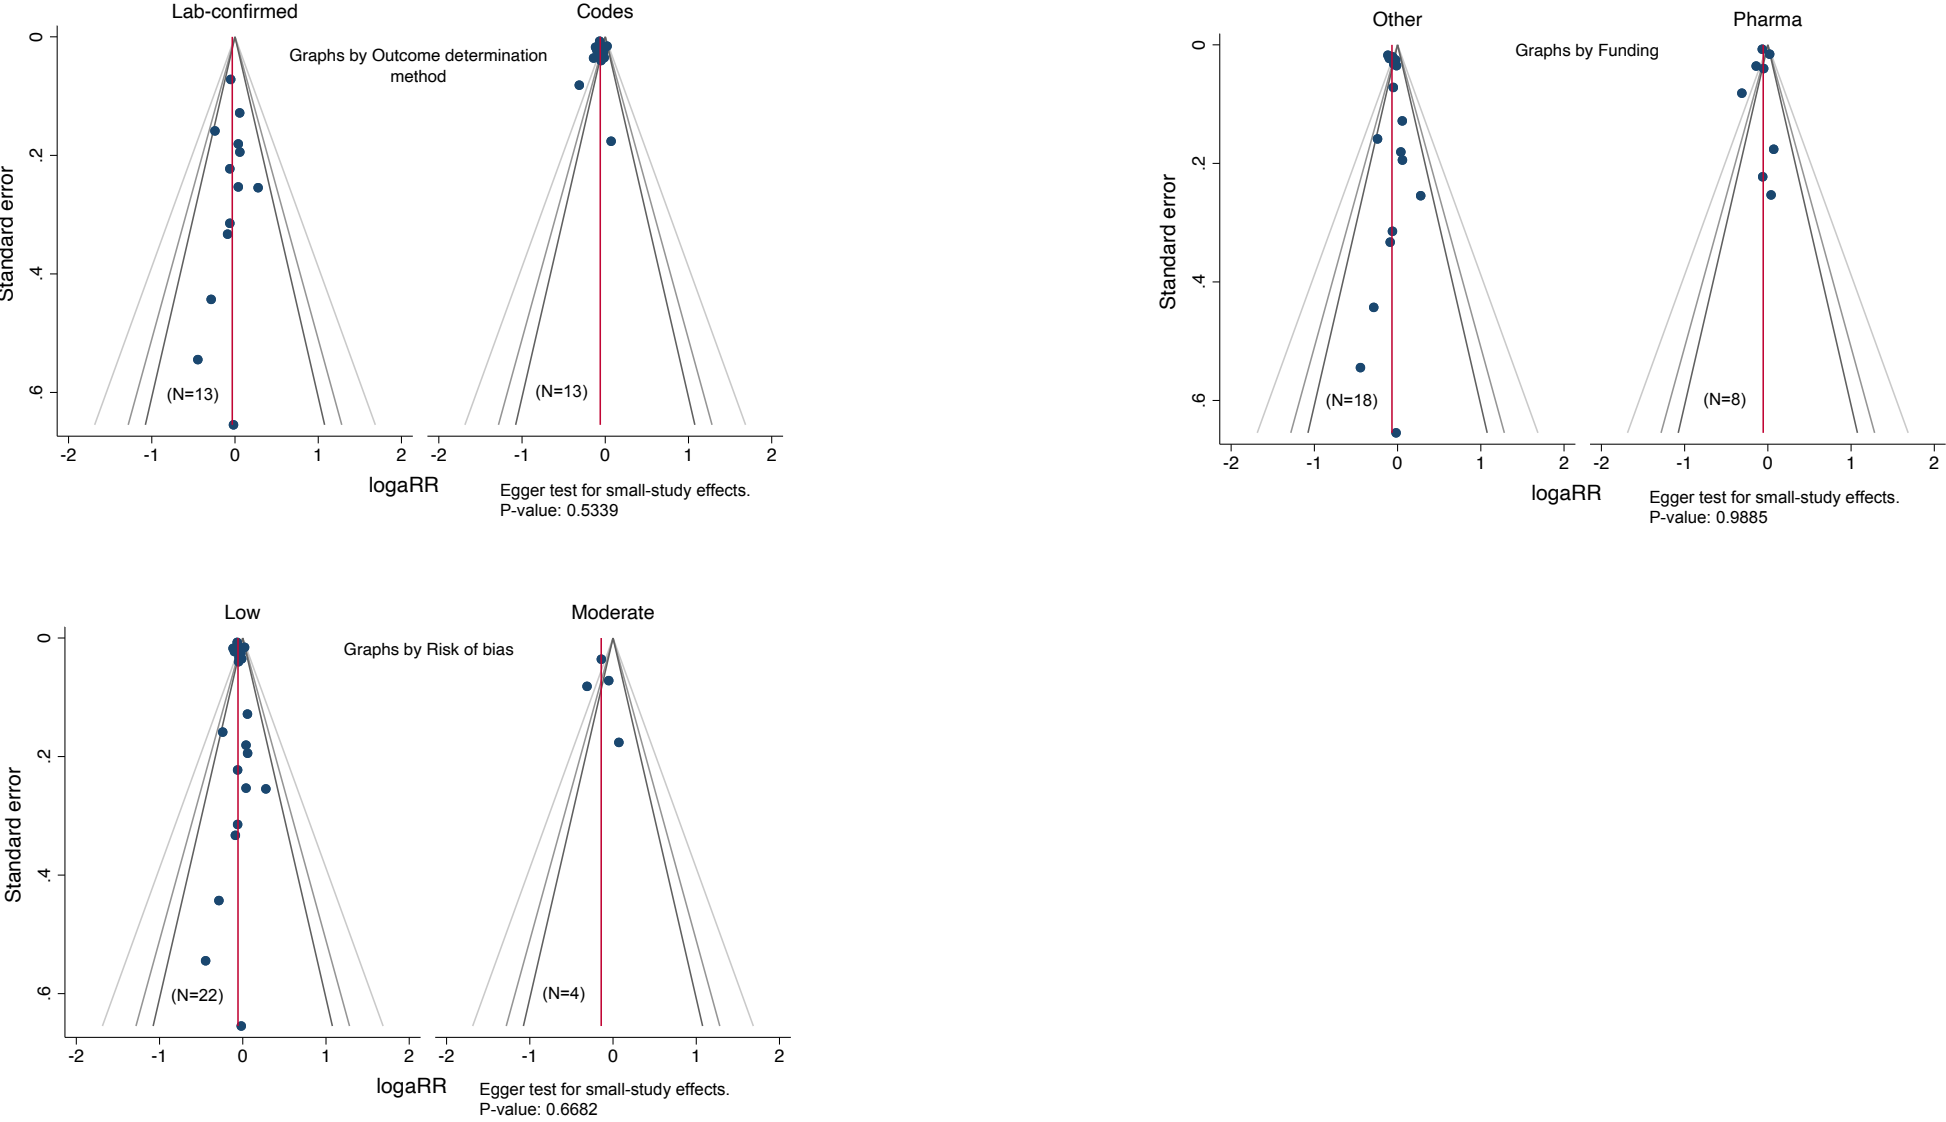

Supplement: s1 [file s1]
