# Supplementary material for: Relative Effectiveness of Cell-Cultured versus Egg-Based Seasonal Influenza Vaccines in Preventing Influenza-Related Outcomes in Subjects 18 Years Old or Older: A Systematic Review and Meta-Analysis
Source: Int J Environ Res Public Health. 2022 Jan 12;19(2):818. doi: 10.3390/ijerph19020818 (PMC8775496; doi:10.3390/ijerph19020818)
Supplement: Supplementary file 1 [file ijerph-19-00818-s001.zip]

Archive with 7 entries (7 files):
- Figure_S1_v04.pdf
- Figure_S2_v04.pdf
- Figure_S3 Funnel plots a to g_v04.pdf
- Figure_S4_v04.pdf
- Figure_S5_v04.pdf
- Table S1 Studies reporting relative vaccine effectiveness v04.xlsx
- Table S2 Sensitivity Leave one out analysis v04.pdf
